# Supplementary material for: A Single-Leg Vertical Hop Test Is an Effective Tool to Measure Functional Performance after Anterior Cruciate Ligament (ACL) Reconstruction
Source: MDPI journal article supplement (doi:10.3390/app14083143), 2024-04-09
Supplement: s1 [file s1]

## Supplemental material

**TABLE S1:** Univariate correlations between jump heights during single-leg vertical hop test (SLVHT) at 6 months post-operatively and different parameters

|                              | Jump height healthy leg [cm] | Jump height injured leg [cm] | Age [group] | Leg length [cm] | Height [cm] | Weight [kg] | Gender [m; f] | Injury Severity | LSI [%] |
|------------------------------|------------------------------|------------------------------|-------------|-----------------|-------------|-------------|---------------|-----------------|---------|
| Jump height healthy leg [cm] |                              | 0.776**                      | -0.123      | 0.050           | 0.138       | 0.072       | 0.229**       | 0.069           | 0.055   |
| Jump height injured leg [cm] | 0.776**                      |                              | -0.163      | 0.033           | 0.050       | -0.025      | 0.101         | 0.001           | 0.630** |
| Age [group]                  | -0.123                       | -0.163                       |             | 0.072           | 0.004       | 0.243**     | -0.045        | 0.102           | -0.104  |
| Leg length [cm]              | 0.050                        | 0.033                        | 0.072       |                 | 0.690**     | 0.397**     | 0.303**       | -0.144          | -0.042  |
| Height [cm]                  | 0.138                        | 0.050                        | 0.004       | 0.690**         |             | 0.674**     | 0.669**       | -0.003          | -0.119  |
| Weight [kg]                  | 0.072                        | -0.025                       | 0.243**     | 0.397**         | 0.674**     |             | 0.597**       | 0.041           | -0.116  |
| Gender [m;f]                 | 0.229**                      | 0.101                        | -0.045      | 0.303**         | 0.669**     | 0.597**     |               | 0.070           | -0.118  |
| Injury severity              | 0.069                        | 0.001                        | 0.102       | -0.144          | -0.003      | 0.041       | 0.070         |                 | -0.086  |
| LSI [%]                      | 0.055                        | 0.630**                      | -0.104      | -0.042          | -0.119      | -0.116      | -0.118        | -0.086          |         |

Data is presented as R – Spearman's correlation coefficient. \*\*: significant correlation ( $p \leq 0.01$ ); Abbreviation: LSI, limb symmetry index; SLVHT, single-leg vertical hop test

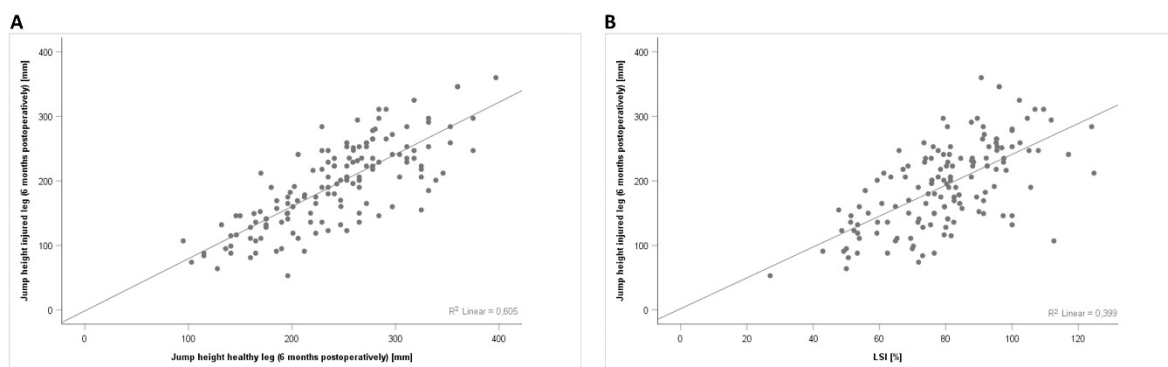

**FIGURE S1:** Univariate correlations between jump heights during single-leg vertical hop test (SLVHT) at 6 months post-operatively and (A) Jump Height with the healthy leg; (B) Limb Symmetry Index (LSI).

**TABLE S2:** Multivariate linear regression analysis for the jump height with the injured leg during single-leg vertical hop test (SLVHT) 6 months postoperatively

|                              | $\beta$ | T      | p      |
|------------------------------|---------|--------|--------|
| Jump height healthy leg [cm] | 0.776   | 51.506 | <0.001 |
| Age [group]                  | 0.001   | 0.044  | 0.965  |
| Leg length [cm]              | -0.013  | -0.566 | 0.572  |
| Height [cm]                  | 0.027   | 0.861  | 0.391  |
| Weight [kg]                  | -0.031  | -1,577 | 0.118  |
| Gender [m;f]                 | -0.008  | -0.356 | 0.723  |
| Injury severity              | -0.013  | -0.867 | 0.388  |
| Injured side                 | -0.004  | -0.302 | 0.763  |
| LSI [%]                      | 0.610   | 40,609 | <0.001 |
| Significance (ANOVA)         |         |        | <0.001 |

Abbreviations: LSI, limb symmetry index; SLVHT, single leg vertical hop test

**TABLE S3:** Stepwise multivariate linear regression analysis for the jump height with the healthy leg during single-leg vertical hop test (SLVHT)

|                            | $\beta$ | T      | p     |
|----------------------------|---------|--------|-------|
| Gender [m;f]               | 0.201   | 2.287  | 0.024 |
| <i>Excluded variables:</i> |         |        |       |
| Age [group]                | -0.138  | -1.575 | 0.118 |
| Leg length [cm]            | -0.020  | -0.211 | 0.833 |
| Height [cm]                | -0.064  | -0.542 | 0.589 |
| Weight [kg]                | -0.057  | -0.553 | 0.581 |
| Injured side               | 0.053   | 0.597  | 0.552 |

Abbreviations: LSI, limb symmetry index; SLVHT, single leg vertical hop test
