# Supplementary material for: A Single-Leg Vertical Hop Test Is an Effective Tool to Measure Functional Performance after Anterior Cruciate Ligament (ACL) Reconstruction
Source: MDPI journal article supplement (doi:10.3390/app14083143), 2024-04-09
Supplement: s1 [file s1]

Archive with 1 entries (1 files):
- Supplemental material_SLVHT ACL-R_V1.1_20240404.pdf
